# Supplementary material for: Arsenic trioxide is required in the treatment of newly diagnosed acute promyelocytic leukemia. Analysis of a randomized trial (APL 2006) by the French Belgian Swiss APL group
Source: PubMed Central journal article supplement — Haematologica. 2018 Jul 19;103(12):2033–9. doi: 10.3324/haematol.2018.198614 (PMC6269295; doi:10.3324/haematol.2018.198614), 2018-12
Supplement: 2018_198614-Disclosures_and_Contributions.pdf [file 2018_198614-Disclosures_and_Contributions.pdf]

Haematologica  
HAEMATOL/2018/198614  
Version 3

Arsenic trioxide is required in the treatment of newly diagnosed acute promyelocytic leukemia. Analysis of a randomized trial (APL 2006) by the French Belgian Swiss APL group

Lionel Adès, Xavier Thomas, Agnes Guerci Bresler, Emmanuel Raffoux, Olivier Spertini, Norbert Vey, Tony Marchand, Christian Récher, Arnaud Pigneux, Stephane Girault, Eric Deconinck, Claude Gardin, Olivier Tournilhac, Jean Francois Lambert, Patrice Chevallier, Stephane de Botton, Juile Lejeune, Hervé Dombret, Sylvie Chevret, and Pierre Fenaux

Collaborative Groups: French Belgian Swiss APL group)

Disclosures: Funding sources for the manuscript: This study was supported by the programme hospitalier de recherche clinique and the Association pour la Recherche sur le Cancer (ARC).

Contributions: LA HD SC and PF designed the trial. LA SC JL PF Analyzed the data. LA PF SC drafted the manuscript. LA XT AGB ER OS NV CR AP SG ED CG OT JF L PC SdB HD enrolled the patient.
